1 **TITLE:**

2 Cohort profile of the ICMR-Stillbirth Pooled India Cohort (ICMR-SPIC):  
3 Estimating Prevalence, Analyzing Risk Factors, and Developing Prediction  
4 Models for Stillbirths in India

5

6 **Authors:**

7 ICMR-SPIC Consortium

8

9 **Affiliations:** Names and affiliations of consortium members are listed at the end of the  
10 manuscript

11

12 **Corresponding author:**

13 Dr Reema Mukherjee

14 Affiliation: Scientist E, Division of Reproductive, Child Health and Nutrition,  
15 Indian Council of Medical Research (ICMR)

16 Email: rimamukerjee@gmail.com

17

18 **Keywords:** maternal health, stillbirth, mortality, gestational Age, preterm birth, LMIC, India

## 19 **ABSTRACT**

### 20 **Purpose**

21 Stillbirth is a significant public health problem in India, yet comprehensive epidemiological  
22 data on its prevalence and risk factors are lacking. This initiative develops a pooled dataset  
23 from 10 well-characterized pregnancy cohorts across urban and rural India to estimate the  
24 national prevalence of stillbirths, identify risk factors and their population-attributable  
25 fractions, and develop a predictive risk stratification model for evidence-based clinical  
26 decision-making and interventions in high-risk pregnancies.

### 27 **Participants**

28 Pregnant women were recruited from the health facilities and community settings during the  
29 antenatal period. Recruitment spans four urban, four rural, and two mixed urban-rural sites,  
30 ensuring diversity in geographic and demographic representation.

### 31 **Findings to Date**

32 The ICMR stillbirth pooled India cohort (ICMR-SPIC) comprises 229,695 pregnant women.  
33 The mean (standard deviation) maternal Age at recruitment was 23.5(3.3) years. 30.5% were  
34 underweight (BMI <18.5 kg/m<sup>2</sup>) and 16.8% were overweight or obese (BMI ≥23 kg/m<sup>2</sup>).  
35 Short stature (<145 cm) was observed in 6.9% of participants. The mean (SD) gestational Age  
36 at birth was 38.7 (2.5) weeks. A third of the participants (33.3%) experienced moderate to  
37 severe anaemia during pregnancy (Hb<9.5g/dL), 52.8% were multiparous, and 22.5%  
38 conceived within 18 months of their previous childbirth. Core maternal risk factors such as  
39 short stature, BMI, parity, prior stillbirths, and anaemia during pregnancy were recorded in all  
40 cohorts. Additional variables, including gestational weight gain, preeclampsia/eclampsia,  
41 antepartum hemorrhage, and fetal distress, were available for over 80% of the cohorts,  
42 ensuring robust data coverage for risk factor analysis and modeling.

### 43 **Future Plans**

44 ICMR-SPIC will be used to conduct individual-level pooled data analyses to estimate  
45 prevalence, identify key risk factors, and develop predictive models for stillbirths. Findings  
46 will inform policies, clinical guidelines, and targeted interventions for high-risk pregnancies.  
47 The harmonized ICMR-SPIC dataset is a landmark collaborative effort to advance maternal  
48 and newborn health in India.

## 50 **STRENGTHS AND LIMITATIONS**

- 51 • The harmonized **ICMR-SPIC pooled dataset** is the largest and most comprehensive  
52 resource for investigating the prevalence and determinants of stillbirths in India. It

53 represents diverse geographical regions, encompassing both urban and rural recruitment  
54 sites, and provides a broad demographic spectrum.

55 • **Gestational Age at birth** was objectively determined using ultrasound measurements or  
56 last menstrual period data, enabling accurate categorization of stillbirths.

57 • The **prospective cohort design** facilitates identification of at-risk populations by  
58 providing demographic data across most cohorts and enabling longitudinal tracking of  
59 some modifiable risk factors.

60 • Despite rigorous efforts to harmonize data, variations in the measurement methods for  
61 certain modifiable risk factors (e.g., reproductive tract infections, preeclampsia, and  
62 haemoglobin concentrations) may result in residual misclassification, potentially  
63 affecting the precision of some risk analyses.

64 • A notable limitation of the dataset is the lack of detailed data in several cohorts to  
65 distinguish between **antepartum** and **intrapartum stillbirths**, or assess the quality of  
66 care during labour and childbirth. This restricts the ability to provide robust prevalence  
67 estimates or identify specific determinants for the two types of stillbirths.

## 68 INTRODUCTION

69 The World Health Organization defines stillbirth as a baby born with no signs of life  
70 after 28 weeks of gestation or with a birthweight of less than 1000 grams[1]. Stillbirths before  
71 the onset of labor are classified as antepartum stillbirths, whereas those during labor and  
72 childbirth are grouped as intrapartum stillbirths. The Every Newborn Action Plan endorsed by  
73 the World Health Assembly in 2014 set a target of reducing the stillbirth rate to <12/1000  
74 total births by 2030[1]. Furthermore, India pledged to reduce stillbirth and early neonatal  
75 mortality rates to <10/1000 births by 2030 through a focused strategy proposed in the 2014  
76 India Newborn Action Plan[2]. Despite notable progress, most low- and middle-income  
77 countries (LMICs), including India, remain off track to achieve global targets for stillbirth  
78 reduction. The Global Burden of Disease study confirmed that India contributed the highest  
79 number (397,300) of stillbirths globally in 2021[3,4]. Over the past two decades, India has  
80 achieved an average annual reduction rate (ARR) of 4% in stillbirth rates, culminating in a  
81 53% decline in 2019 compared to 2000 (29.6 stillbirths per 1,000 total births in 2000 vs. 13.9  
82 in 2019). However, the most recent estimates indicate that the burden remains unacceptably  
83 high, underscoring the need for intensified efforts to enhance maternal and perinatal  
84 healthcare systems to address persistent inequities [5,6].

85 Several challenges must be addressed to achieve the goal of reducing stillbirths in  
86 India. Notably, stillbirth targets are absent from global policy agendas, including the  
87 Sustainable Development Goals, and the definition of stillbirth varies across healthcare  
88 contexts, leading to misclassification and impeding international comparisons (Supplementary  
89 Table 1). This variation also contributes to discrepancies in stillbirth prevalence reported in  
90 different Indian registries[7,8]. Additionally, mechanisms for documenting stillbirths in  
91 LMICs, including India, remain suboptimal. For instance, the National Family Health Survey  
92 in India conflates stillbirths, miscarriages, and abortions as it relies on maternal self-  
93 reports[7], often introducing bias due to low maternal education and knowledge about  
94 stillbirths. Furthermore, there is limited epidemiological evidence on the burden and risk  
95 factors for stillbirths across India's diverse regions[9,10], which is essential for designing  
96 tailored interventions. Generating comprehensive evidence on the prevalence and risk factors  
97 for stillbirths at a national scale necessitates coordinated, large-scale efforts that surpass the  
98 capacity of individual investigators, requiring multi-institutional collaboration, standardized  
99 methodologies, and robust data systems.

100 A collaborative, team-based approach is essential for generating robust evidence on  
101 stillbirths in India. The ICMR formed a consortium of pregnancy cohort studies to generate a

102 harmonized dataset to estimate stillbirth prevalence, identify risk factors, and develop models  
103 to predict pregnancies at high risk of stillbirths in India. This initiative also aims to  
104 standardize the definition of stillbirth, enabling accurate burden estimation and advocacy. By  
105 aligning with India's Every Newborn Action Plan, this effort is pivotal in developing  
106 evidence-based policies, interventions, and clinical guidelines to reduce preventable  
107 stillbirths.

108 Here, we outline the process of harmonizing data from multiple pregnancy cohorts to develop  
109 the Indian Council of Medical Research-Stillbirth Pooled India Cohort Dataset (ICMR-SPIC)  
110 and provide a concise description of the cohort profile. The ICMR-SPIC aims to estimate the  
111 national stillbirth rates in India, assess the associations between specific risk factors and  
112 stillbirths to evaluate their relevance for the Indian population and calculate the population  
113 attributable fraction for each risk factor to identify those with the most significant impact.  
114 Additionally, we will develop a risk prediction model for the early identification of  
115 pregnancies at high risk of stillbirth. This comprehensive approach provides a robust  
116 framework for generating actionable insights to reduce stillbirth rates in India.

117

## 118 **METHODS**

### 119 **Selection of studies**

120 In 2023, the ICMR coordinated forming of a consortium of investigators leading pregnancy  
121 cohorts in India, with the primary goal of pooling and harmonising data across all existing  
122 relevant cohorts. The dataset will be used for estimating the burden and determinants of  
123 stillbirths in India at the national level and for developing and validating a risk prediction  
124 model for identifying pregnancies at high risk of stillbirths that could benefit from targeted  
125 interventions. Ten investigator groups managing pregnancy cohorts joined the ICMR-SPIC  
126 consortium; details are provided in Supplementary Table 2. The consortium commenced its  
127 work in April 2024 after confirming the involvement of researchers, the availability of ethics  
128 and regulatory approvals, and signing agreements for sharing de-identified cohort data with  
129 the ICMR.

130

131 For a cohort study to be included in the pooled analysis, the study should have fulfilled the  
132 following criteria:

- 133 1. The study must be conducted in either urban or rural India. Pregnant women could be  
134 recruited in health facilities or community settings.

- 135 2. The cohort studies should have appropriate ethics and regulatory approvals, including  
136 participant consent for sharing data with third parties for secondary analysis.
- 137 3. Pregnant women should have been recruited before the birth of their child and  
138 followed longitudinally until a birth outcome (live birth, stillbirth, medical or  
139 spontaneous abortion) was recorded.
- 140 4. The cohort studies must provide detailed descriptions of the study methods, including  
141 recruitment and sampling strategies, inclusion and exclusion criteria, and detailed  
142 definitions for all the variables shared with the consortium, to enable data  
143 harmonisation and accurate interpretation of the results.
- 144 5. The dataset must include a core set of "required" variables, such as gestational Age at  
145 childbirth (GA), along with methods determining GA (Last Menstrual Period or  
146 ultrasonography), and a set of sociodemographic variables, such as maternal Age at  
147 childbirth, education levels, etc.
- 148 6. While desirable, the availability of details of medical conditions, obstetric  
149 complications, and behavioral factors were not considered mandatory.

150

#### 151 **Data sources for ICMR-SPIC**

152 Ten datasets were included in the pooled ICMR-SPIC database (see Table 1 for details),  
153 spanning 17 sites across nine Indian states representing North, West, Central, South, and  
154 North-Eastern India. One study (MaatHRI) included study sites in the North, North-East, and  
155 Central Indian regions. Eight out of ten studies followed an observational study design.  
156 Among the two intervention studies that were included, the WINGS cohort contributed data  
157 only from the control arm. In contrast, the CalPreg cohort contributed data from both the  
158 control and intervention arms, as the intervention differed only in the dose of calcium  
159 administered during pregnancy. Furthermore, four out of ten cohorts recruited participants  
160 from community settings and the remaining six were hospital-based. While there was an  
161 equal representation of the *number of sites* contributing data from urban and rural areas (four  
162 each from urban and rural areas, and two with mixed urban and rural populations, see Table  
163 1), the majority of participants, *in absolute numbers* (91.8%, Table 3), were from rural areas.

164

165

166

167

168

169 **Table 1:** Details of pregnancy cohort studies included in the ICMR-SPIC harmonised dataset

| Sr. No | Short title   | Key studies (PMID)                                                               | State / Region in India                                                                                  | Location | Study duration | Study design                 | Sample size <sup>1</sup> |
|--------|---------------|----------------------------------------------------------------------------------|----------------------------------------------------------------------------------------------------------|----------|----------------|------------------------------|--------------------------|
| 1      | CalPreg       | 34819147<br>38197817                                                             | Karnataka/South                                                                                          | Urban    | 2018-2021      | Intervention                 | 10,544                   |
| 2      | GARBHINI      | 39021476<br>30770926<br>33931016<br>37492417<br>39030058                         | Haryana/North                                                                                            | Mixed    | 2015-2020      | Observational                | 7,002                    |
| 3      | LIFE          | 27649805<br>30400845<br>31819983<br>31854166<br>35923508                         | Telangana/South                                                                                          | Rural    | 2010-2018      | Observational                | 1,269                    |
| 4      | MAASTHI       | 36130760<br>31828224<br>31920399<br>33292687                                     | Karnataka/South                                                                                          | Urban    | 2016-2019      | Observational                | 3,280                    |
| 5      | MaatHRI       | 33500775<br>34607867<br>34585123<br>35934263<br>37651649<br>38757059<br>39513665 | Assam and Meghalaya/North-East; Chhattisgarh, Uttar Pradesh, Himachal Pradesh/North; Maharashtra/Central | Mixed    | 2018-2023      | Observational                | 10,109                   |
| 6      | MNHR-Belagavi | 22738806<br>25177075<br>26063586<br>26063292<br>33334337<br>33256783<br>33256770 | Karnataka/South                                                                                          | Rural    | 2010 -2020     | Observational                | 111,645                  |
| 7      | MNHR-Nagpur   | 35972913<br>31383691<br>30093518<br>33334356<br>33334337                         | Maharashtra/Central                                                                                      | Rural    | 2010 - 2020    | Observational                | 82,232                   |
| 8      | PMNS          | 34610922<br>12586996<br>11285330                                                 | Maharashtra/West                                                                                         | Rural    | 1994-1996      | Observational                | 770                      |
| 9      | REVAMP        | 36275827<br>38965425<br>37129568                                                 | Maharashtra/West                                                                                         | Urban    | 2017-2022      | Observational                | 1,745                    |
| 10     | WINGS         | 36288808<br>38165408                                                             | New Delhi/North                                                                                          | Urban    | 2017-2020      | Intervention – Control group | 1,099                    |

<sup>1</sup>Number of pregnancies included in the ICMR-SPIC dataset

170  
171

## 172 **Data harmonization and data cleaning**

173 A preliminary draft of the data dictionary and codebook that listed the essential and desirable  
174 variables to be included in the ICMR-SPIC dataset was prepared including their tentative  
175 definitions and harmonised variable names. This draft was shared with all the consortium  
176 partners for review and comments. The consortium members discussed, modified, and  
177 mutually agreed on the final list of variables and their definitions. The updated data dictionary

178 and codebook was shared with all the consortium members for mapping and recoding their  
179 data into the final data template. Each cohort performed thorough data cleaning to adhere to  
180 the definitions and codes, and prepared detailed notes on how data on each variable was  
181 collected and categorized to minimise variations in measurement methods that could impact  
182 the interpretation of results. If the teams were unable to adhere to the harmonised definitions,  
183 they provided a detailed description of the discrepancy compared with the requested format,  
184 definition, or assessment method. Each cohort then uploaded the cleaned and final dataset  
185 along with the annotated codebook on a secure webserver managed by ICMR.  
186 The core statistical analysis team then reviewed each dataset to ensure fidelity to the  
187 harmonization template. Data managers of the respective cohorts corrected any errors  
188 highlighted by the statistical team. Some cohorts had recruited the same participant across  
189 multiple pregnancies. In these cases, a decision was made to represent each row as a unique  
190 pregnancy, with one column linking participants across pregnancies whenever possible.  
191 Multifetal gestations were reported as individual rows for each fetus, with a column indicating  
192 singleton or multiple gestation for each observation. This allowed the team to assess the  
193 outcome of each birth from all pregnancies while accounting for the fact that not all  
194 participants were independent in the combined dataset, which will be accounted for using  
195 appropriate statistical methods during the analysis. Summary statistics and histograms/bar  
196 graphs were plotted for each derived variable and their component raw variables to identify  
197 outliers and missing data were examined. Codes were written to check for range and logical  
198 errors for each variable, and any data or coding errors were corrected with help from the  
199 respective cohort's data managers. The final verified datasets were then sequentially appended  
200 to the master dataset one at a time using code prepared in STATA version 16 (Stata Corp.,  
201 College Station, USA) or R version 3.3.3 (R Core Team, 2023; [https://www.R-](https://www.R-project.org/)  
202 [project.org/](https://www.R-project.org/)). The only major exclusion was missing outcome data (live/stillbirth) or if the  
203 fetus was naturally or medically aborted. The harmonized dataset was accessible to all  
204 consortium members through password protected access controls to the secure server.

205

## 206 **Definitions**

207 The final list of variables and their definitions are presented in Table 2. Gestational Age (GA)  
208 calculation was prioritised from ultrasound data when available and from last menstrual  
209 period if ultrasound data was not available. GA was used to determine what proportions of  
210 births were preterm and to calculate the time-period (or gestational Age) of measurement of  
211 each risk factor during the pregnancy. This was done to enable adjustments for time-varying



212 exposures in statistical models, as many risk factors are known to have differential effects on  
 213 stillbirth outcome depending on the stage at which they affect pregnancy.

214

215 *Primary outcome measure: Stillbirth*

216 The team made a decision to adopt the WHO definition of stillbirth (birth of a fetus without  
 217 any sign of life at or after 28 weeks of gestation), which is recommended for international  
 218 comparisons.

219

220 **Table 2:**List of variables and harmonised definitions

| Sr. No.                                  | Variable                                                          | Harmonised variable definition                                                                                                                                                                        |
|------------------------------------------|-------------------------------------------------------------------|-------------------------------------------------------------------------------------------------------------------------------------------------------------------------------------------------------|
| <b>Outcome measure</b>                   |                                                                   |                                                                                                                                                                                                       |
| 1                                        | Stillbirth                                                        | categorical; Yes/No/Not collected                                                                                                                                                                     |
| <b>Maternal sociodemographic factors</b> |                                                                   |                                                                                                                                                                                                       |
| 1                                        | Maternal Age                                                      | continuous; completed years                                                                                                                                                                           |
| 2                                        | Location                                                          | categorical; urban/rural/Not collected                                                                                                                                                                |
| 3                                        | Maternal education in years                                       | continuous; completed years; level of maternal education (primary, secondary, etc, if completed years not available)                                                                                  |
| 5                                        | Consanguineous marriage                                           | categorical; Yes/No/Not collected                                                                                                                                                                     |
| 6                                        | Fuel type for cooking or heating                                  | categorical;LPG/Natural gas/Kerosene/Coal/Charcoal/Wood/Dung cakes/Straw/Shrub/Grass/Agricultural crop waste/Biogas/Other/Combination of any of the above                                             |
| 7                                        | Source of drinking water                                          | categorical; Piped water into dwelling/ Public tap/Tubewell, borehole, or hand pump/Open well/Closed well/Tanker truck/Surface water/Bottled water/Rain water/ Other/ Combination of any of the above |
| <b>Maternal health history</b>           |                                                                   |                                                                                                                                                                                                       |
| 1                                        | Weight (during pregnancy)                                         | continuous; in kg                                                                                                                                                                                     |
| 2                                        | Height (during pregnancy)                                         | continuous, in cm                                                                                                                                                                                     |
| 3                                        | Biceps skinfold thickness                                         | continuous, in cm                                                                                                                                                                                     |
| 4                                        | Triceps skinfold thickness                                        | continuous, in cm                                                                                                                                                                                     |
| 5                                        | Subscapular skinfold thickness                                    | continuous, in cm                                                                                                                                                                                     |
| 6                                        | Mid-upper-arm circumference                                       | continuous, in cm                                                                                                                                                                                     |
| 7                                        | Parity                                                            | discrete; count                                                                                                                                                                                       |
| 8                                        | Inter-pregnancy interval                                          | continuous; completed months                                                                                                                                                                          |
| 9                                        | Previous history of stillbirth                                    | categorical; Yes/No/Not applicable/Not collected                                                                                                                                                      |
| 10                                       | History of previous abortion                                      | categorical; Yes/No/Not applicable/Not collected                                                                                                                                                      |
| 11                                       | Prior caesarean section                                           | categorical; Yes/No/Not applicable/Not collected                                                                                                                                                      |
| 12                                       | Pre-existing hypertension                                         | categorical; Yes/No/Not collected                                                                                                                                                                     |
| 13                                       | Family history of diabetes/hypertension/ cardiovascular disorders | categorical; Yes/No/Not collected                                                                                                                                                                     |
| 14                                       | Artificial reproductive techniques                                | categorical; Yes/No/Not collected                                                                                                                                                                     |
| 15                                       | Infertility treatment                                             | categorical; Yes/No/Not collected                                                                                                                                                                     |
| <b>Maternal health behaviours</b>        |                                                                   |                                                                                                                                                                                                       |
| 1                                        | Tobacco consumption                                               | categorical; Yes/No/Not collected                                                                                                                                                                     |
| 2                                        | Alcohol consumption                                               | categorical; Yes/No/Not collected                                                                                                                                                                     |
| 3                                        | Passive smoking                                                   | categorical; Yes/No/Not collected                                                                                                                                                                     |
| 4                                        | Number of ANC visits                                              | discrete; count                                                                                                                                                                                       |
| <b>Maternal health during pregnancy</b>  |                                                                   |                                                                                                                                                                                                       |
| 1                                        | Stress or depressive symptoms                                     | continuous; raw score from tool of choice (EPDS/PHQ-9)                                                                                                                                                |
| 2                                        | Overt diabetes                                                    | categorical; Yes/No/Not collected                                                                                                                                                                     |

|                                                    |                                                                                                 |                                                                                                 |
|----------------------------------------------------|-------------------------------------------------------------------------------------------------|-------------------------------------------------------------------------------------------------|
| 3                                                  | Glycated haemoglobin (HbA1c)                                                                    | continuous; %                                                                                   |
| 4                                                  | Gestational diabetes (GDM)                                                                      | categorical; Yes/No/Not collected                                                               |
| 5                                                  | GDM time of diagnosis                                                                           | continuous; completed weeks of gestation                                                        |
| 6                                                  | Haemoglobin                                                                                     | continuous; g/dL                                                                                |
| 7                                                  | Haemoglobin – method of assessment                                                              | categorical; Autoanalyser/Point of care testing/Sahli's method/Photometric method/Not collected |
| 8                                                  | Fasting plasma glucose                                                                          | continuous; mg/dL                                                                               |
| 9                                                  | 1-hr plasma glucose: Oral glucose tolerance test                                                | continuous; mg/dL                                                                               |
| 10                                                 | 2-hr plasma glucose: Oral glucose tolerance test                                                | continuous; mg/dL                                                                               |
| 11                                                 | Systolic blood pressure                                                                         | continuous; mmHg                                                                                |
| 12                                                 | Diastolic blood pressure                                                                        | continuous; mmHg                                                                                |
| 13                                                 | Urinary protein                                                                                 | continuous; g/dL                                                                                |
| 15                                                 | Gestational hypertension (GH)                                                                   | categorical; Yes/No/Not collected                                                               |
| 16                                                 | Time of diagnosis: GH                                                                           | continuous; completed weeks of gestation                                                        |
| 17                                                 | Preeclampsia                                                                                    | categorical; Yes/No/Not collected                                                               |
| 18                                                 | Time of diagnosis: Preeclampsia                                                                 | continuous; completed weeks of gestation                                                        |
| 19                                                 | Eclampsia                                                                                       | categorical; Yes/No/Not collected                                                               |
| 20                                                 | Time of diagnosis: Eclampsia                                                                    | continuous; completed weeks                                                                     |
| 21                                                 | Thyroid disorder                                                                                | categorical; Hypothyroidism/Hyperthyroidism/Euthyroid/Not collected                             |
| <b>Maternal infections during pregnancy</b>        |                                                                                                 |                                                                                                 |
| 1                                                  | Asymptomatic bacteriuria                                                                        | categorical; Yes/No/Not collected                                                               |
| 2                                                  | Reproductive tract infection                                                                    | categorical; Yes/No/Not collected                                                               |
| 3                                                  | Syphilis                                                                                        | categorical; Yes/No/Not collected                                                               |
| 4                                                  | Human immunodeficiency virus                                                                    | categorical; Yes/No/Not collected                                                               |
| 5                                                  | Malaria                                                                                         | categorical; Yes/No/Not collected                                                               |
| 6                                                  | Rubella                                                                                         | categorical; Yes/No/Not collected                                                               |
| 7                                                  | Varicella                                                                                       | categorical; Yes/No/Not collected                                                               |
| 8                                                  | Toxoplasma                                                                                      | categorical; Yes/No/Not collected                                                               |
| 9                                                  | Hepatitis B                                                                                     | categorical; Yes/No/Not collected                                                               |
| 10                                                 | Tuberculosis                                                                                    | categorical; Yes/No/Not collected                                                               |
| 11                                                 | Cytomegalovirus                                                                                 | categorical; Yes/No/Not collected                                                               |
| <b>Obstetric factors at the time of childbirth</b> |                                                                                                 |                                                                                                 |
| 1                                                  | Date of childbirth                                                                              | date variable; DD/MM/YYYY                                                                       |
| 2                                                  | Mode of childbirth                                                                              | categorical : vaginal/assisted/caesarean                                                        |
| 3                                                  | Place of childbirth                                                                             | categorical; Institutional/Non-institutional/Not collected                                      |
| 4                                                  | Gestational Age (GA) at childbirth                                                              | continuous, in <b>weeks</b>                                                                     |
| 5                                                  | GA at childbirth in days                                                                        | continuous, in <b>days</b>                                                                      |
| 6                                                  | Method of dating GA                                                                             | categorical; Ultrasound sonography (USG)/Last menstrual period/Others                           |
| 7                                                  | USG method of dating GA                                                                         | categorical; Crown-Rump length/Other fetal biometry/Not applicable                              |
| 8                                                  | GA at dating (weeks)                                                                            | continuous, in weeks                                                                            |
| 9                                                  | GA at dating (days)                                                                             | continuous, in days                                                                             |
| 10                                                 | Date of dating                                                                                  | date variable; DD/MM/YYYY                                                                       |
| 11                                                 | Ultrasound evidence of fetal heart activity just before onset of labour or rupture of membranes | categorical; Yes/No/Not collected                                                               |
| 12                                                 | Perception of fetal movements just before onset of labour or rupture of membranes               | categorical; Yes/No/Not collected                                                               |
| 13                                                 | Obstructed or prolonged labour or failure to progress                                           | categorical; Yes/No/Not collected                                                               |
| 14                                                 | Mal-presentation at childbirth                                                                  | categorical; Yes/No/Not collected                                                               |
| 15                                                 | Antepartum haemorrhage                                                                          | categorical; Yes/No/Not collected                                                               |
| 17                                                 | Amniotic fluid disorders (AFD)                                                                  | categorical;                                                                                    |

|                                                                           |                                |                                                     |
|---------------------------------------------------------------------------|--------------------------------|-----------------------------------------------------|
|                                                                           |                                | Oligohydramnios/Polyhydramnios/Normal/Not collected |
| 18                                                                        | Time of diagnosis: AFD         | continuous; completed weeks of gestation            |
| <b>Maternal blood biomarkers during pregnancy (available in a subset)</b> |                                |                                                     |
| 1                                                                         | Vitamin B12                    | continuous; pg/mL                                   |
| 2                                                                         | Folate                         | continuous;ng/mL                                    |
| 3                                                                         | Ferritin                       | continuous;ng/mL                                    |
| 5                                                                         | Soluble transferrin receptor   | continuous;mg/mL                                    |
| 6                                                                         | Vitamin D                      | continuous;ng/mL                                    |
| 7                                                                         | Vitamin B6                     | continuous;ng/mL                                    |
| 8                                                                         | Zinc                           | continuous;ug/dL                                    |
| 9                                                                         | Selenium                       | continuous;ug/L                                     |
| 10                                                                        | C-reactive protein (CRP)       | continuous;mg/L                                     |
| 11                                                                        | hs-CRP                         | continuous;mg/L                                     |
| 12                                                                        | Calcium                        | continuous;mg/dL                                    |
| 13                                                                        | Magnesium                      | continuous;mg/dL                                    |
| 14                                                                        | Methyl malonic acid            | continuous;ng/mL                                    |
| 15                                                                        | Cortisol                       | continuous;μg/dL                                    |
| 16                                                                        | Total cholesterol              | continuous;mg/dL                                    |
| 17                                                                        | Low-density lipoprotein (LDL)  | continuous;mg/dL                                    |
| 18                                                                        | High-density lipoprotein (HDL) | continuous;mg/dL                                    |
| 19                                                                        | Triglycerides (TGL)            | continuous;mg/dL                                    |
| 20                                                                        | Homocysteine                   | continuous;μmol/L                                   |

221

## 222 **Principles and plans for statistical analysis**

223 A detailed study flow diagram outlining the analytical decisions that progressed from the total  
 224 participant pool across all cohorts to the final analytic dataset is presented in Supplementary  
 225 Figure 1. For each objective, a comprehensive statistical analysis and reporting plan was  
 226 formulated in collaboration with the Technical Advisory Group of the ICMR-SPIC  
 227 consortium. This plan delineated the statistical techniques, underlying assumptions, and  
 228 procedural steps, ensuring systematic and transparent analyses (details will be reported in  
 229 subsequent papers). The harmonized dataset will be analyzed using two complementary  
 230 approaches to generate the most robust evidence: (1) a one-stage meta-analysis, an individual-  
 231 level pooled analysis of all available data, and (2) a two-stage meta-analysis: a meta-analysis  
 232 of cohort-specific summary data to examine and account for between-study heterogeneity  
 233 among the cohorts.

234 Using a weighted sample, the stillbirth rate (SBR) will be calculated as the number of  
 235 stillbirths divided by the total number of births expressed per 1,000 total births. To account  
 236 for differences in sample sizes across cohorts, each cohort will be weighted, with weights  
 237 computed as the inverse of the ratio of the individual cohort sample size to the overall pooled  
 238 cohort sample size. The total number of births will be defined as the sum of live births  
 239 (regardless of gestational Age) and stillbirths. SBR at the national level will be reported along  
 240 with the 95% confidence intervals.

241

242 ***Assessment of Risk factors for stillbirths in India***

243 To assess the association and estimate the risk ratios of various sociodemographic and  
244 antenatal risk factors for stillbirth, a modified mixed-effects model will be utilised with each  
245 cohort included as a random effect. Directed acyclic graphs (DAGs) will be drawn to  
246 understand the pathways of the known risk factors. To quantify the impact of each risk factor,  
247 the population attributable fraction (PAF) will be estimated using Miettinen's formula [11],  
248 expressed as:  $PAF = P_e(RR - 1)/RR$ , where  $P_e$  is the proportion of stillbirth cases exposed to  
249 the risk factor, and RR is the adjusted relative risk for that risk factor.

250

251 ***Development and internal validation of a risk prediction model to identify pregnancies at***  
252 ***high risk of stillbirth.***

253 A clinical prediction model will be developed to predict the risk of stillbirth in pregnant  
254 women visiting healthcare facilities using their baseline (fixed) and modifiable risk factors,  
255 aimed to support clinicians in medical decision-making. The optimal set of predictors that  
256 contribute significantly to predicting stillbirths will be identified by domain knowledge-based  
257 and data-driven approaches.

258 Using a naive Bayesian framework, a dynamic model [12] will be used to dynamically assess  
259 the personalised risk of stillbirth. The initial baseline probability will be derived from the  
260 estimated prevalence of stillbirth for the study population. Thereafter, conditional  
261 probabilities will be computed for each new predictor using Bayes Theorem to update the risk  
262 of stillbirth for each pregnant woman. The model will be internally validated on the 'left-out'  
263 dataset. The model will be evaluated for quantifying the error in prediction (root mean  
264 squared error, mean absolute error, and calibration-in-the-large (CITL), discrimination ability  
265 using the area under the receiver operating characteristics curve and decision curve analysis.

266 **PATIENT AND PUBLIC INVOLVEMENT STATEMENT**

267 No patients or members of the public were directly involved in the design, conduct, or  
268 analysis of this secondary data analysis. However, the ICMR-SPIC consortium includes  
269 representatives from India's research, practice, and policy communities to ensure that the  
270 study aligns with national health priorities and addresses key public health concerns.  
271 Dissemination efforts will focus on engaging future mothers and their families, the general  
272 public, non-governmental organizations dedicated to preventing stillbirths and improving  
273 maternal and child health, and other relevant stakeholders. Study findings will be  
274 communicated through diverse channels, including local audio-visual media, print media, and

275 social media platforms, with messages specifically tailored to inform future mothers and their  
276 families about stillbirth risk factors and effective strategies for prevention and management.

277

278

## 279 **CHARACTERISTICS OF THE COHORT PARTICIPANTS**

280 The harmonized ICMR-SPIC dataset comprises individual-level data from a large sample of  
281 2,29,695 pregnant women on maternal sociodemographic, health, lifestyle, and household  
282 factors, as well as characteristics of previous and current pregnancies and objective measures  
283 of birth outcomes (Table 3).

### 284 *a) Maternal sociodemographic and anthropometric characteristics*

285 The mean (standard deviation or SD) maternal Age at enrolment was 23.5(3.3) years.  
286 Education duration varied widely, with a mean (SD) of 7.3 (4.8) years, which is expected for  
287 the profile of women visiting public health facilities in India or residing in urban-poor or rural  
288 community settings. The mean(SD) maternal height was 152.2(5.6) cm, with 6.9% being of  
289 short stature (<145 cm), a known risk factor for adverse pregnancy outcomes, including  
290 stillbirth[13]. Using criteria specified for the South Asian population, 30.5% of women were  
291 underweight (< 18.5 kg/m<sup>2</sup>) and 16.8% were overweight (≥ 23 kg/m<sup>2</sup>), highlighting the double  
292 burden of malnutrition in India - persistent issues of undernutrition along with an emergent  
293 problem of overweight and obesity. The majority of the participants (91.8%) live in rural  
294 areas.

### 295 *b) Maternal household and lifestyle factors*

296 Nearly half the cohort (44.4%) used biomass fuels, known to contribute to indoor air pollution  
297 and respiratory health issues. 22.5% of mothers had an inter-pregnancy interval of <18  
298 months, which has been suggested to be associated with a higher risk of adverse maternal and  
299 child health outcomes. However, data was available only for a quarter of the total sample for  
300 this variable (N=56,822). The distribution of parity was balanced, with 47.2% of women  
301 being nulliparous and 52.8% multiparous, the former being reported as a risk factor for  
302 stillbirths[14]. 27.8% and 1.6% reported being exposed to passive smoking and consuming  
303 alcohol during pregnancy, respectively. However, data for these factors were available in a  
304 small subset of the total population (Table 3).

### 305 *c) Pregnancy characteristics*

306 Although information about the history of abortion was available only for 12,767 women,  
307 26.1% of these women reported having experienced a previous abortion. In contrast,  
308 information about previous stillbirths was available for almost all participants (N=2,24,228),

309 with 1.8% reported experiencing at least one previous stillbirth. The mean (SD) gestational  
 310 Age at childbirth was 38.7 (2.5) weeks, and gestational weight gain per week was 0.4 (0.4) kg  
 311 (N=28,362). The prevalence of pregnancy complications computed from smaller subsets of the  
 312 data was noted as follows: gestational diabetes (5.7%, N=17,265), gestational hypertension  
 313 (2.9%, N=2,19,536), preeclampsia (2.9%, N=30,266), eclampsia (0.2%, N=33,036),  
 314 antepartum hemorrhage (0.5%, N=2,06,152), and fetal malpresentation (2.0%,  
 315 N=2,08,254). The data also revealed substantial and concerning rates of anemia, with 33.3%  
 316 of women having moderate or severe anemia during pregnancy. Additionally, the data  
 317 indicated that 5% of women had thyroid disorders (diagnosed with hypothyroidism).

318 **Table 3:** Sociodemographic and health characteristics of the ICMR-SPIC Cohort

| Variable                                                       | N <sub>(data available)</sub> | % (N)          | Mean (SD)   |
|----------------------------------------------------------------|-------------------------------|----------------|-------------|
| <b>Maternal demographic and anthropometric characteristics</b> |                               |                |             |
| Maternal Age (years)                                           | 2,27,020                      |                | 23.5 (3.3)  |
| Maternal Education (years)                                     | 2,26,555                      |                | 7.3 (4.8)   |
| Maternal Height (cm)                                           | 2,23,632                      |                | 152.2 (5.6) |
| Stature                                                        | Normal (>145 cm)              | 93.0 (208,047) |             |
|                                                                | Short (<145 cm)               | 6.9 (15,585)   |             |
| BMI (kg/m <sup>2</sup> )                                       | 2,24,835                      |                | 20.3 (3.3)  |
| BMI Categories (WHO)                                           | Normal                        | 61.4 (138,140) |             |
|                                                                | Underweight                   | 30.5 (68,508)  |             |
|                                                                | Overweight                    | 8.1 (18,187)   |             |
| BMI Categories (South Asia Specific)                           | Normal                        | 52.6 (118,318) |             |
|                                                                | Underweight                   | 30.5 (68,508)  |             |
|                                                                | Overweight                    | 16.9 (37,009)  |             |
| Location/residence                                             | 2,19,635                      |                |             |
| Categories                                                     | Rural                         | 91.8 (201,635) |             |
|                                                                | Urban                         | 8.2 (18,000)   |             |
| <b>Household and Lifestyle Factors</b>                         |                               |                |             |
| Type of Cooking Fuel                                           | 1,01,977                      |                |             |
| Categories                                                     | Clean Fuel                    | 55.5 (56,628)  |             |
|                                                                | Biomass                       | 44.4 (45,349)  |             |
| Inter-pregnancy Interval (months)                              | 56,822                        |                |             |
| Categories                                                     | ≥18 months                    | 77.4(44,017)   |             |
|                                                                | <18 months                    | 22.5(12,805)   |             |
| Parity                                                         | 2,27,021                      |                |             |
| Categories                                                     | Nulliparous                   | 47.2 (107,153) |             |
|                                                                | Multiparous                   | 52.8(119,868)  |             |
| Passive Smoking                                                | 77,306                        | 27.8 (21,532)  |             |
| Alcohol Consumption                                            | 23,497                        | 1.6 (389)      |             |
| <b>Pregnancy characteristics</b>                               |                               |                |             |
| Gestational Age at Childbirth (weeks)                          | 2,27,313                      |                | 38.7 (2.5)  |
| Weight Gain per Week (kg)                                      | 28,362                        |                | 0.4 (0.4)   |
| Maximum HbA1c (%)                                              | 9,298                         |                | 5.4 (0.5)   |
| Moderate/Severe Anemia during pregnancy                        | 2,19,118                      | 37.6(82,323)   |             |
| Gestational Diabetes                                           | 17,265                        | 5.7 (1,000)    |             |
| Preeclampsia                                                   | 30,266                        | 2.9 (889)      |             |
| Eclampsia                                                      | 33,036                        | 0.2 (69)       |             |
| Gestational Hypertension                                       | 2,19,536                      | 2.9 (6,470)    |             |
| Antepartum Haemorrhage                                         | 2,06,152                      | 0.5 (1,032)    |             |
| Malpresentation                                                | 2,08,254                      | 2.0 (4,277)    |             |
| Previous Abortion                                              | 12,767                        | 26.1(3,342)    |             |

|                                                                            |                 |          |               |  |
|----------------------------------------------------------------------------|-----------------|----------|---------------|--|
| Previous Stillbirth                                                        |                 | 2,24,228 | 1.8 (4,057)   |  |
| Moderate or Severe anaemia at any time point in pregnancy (<Hb 7-9.5 g/dL) |                 | 175,040  | 33.3 (58,291) |  |
| Thyroid Disorders                                                          |                 | 23,450   |               |  |
| Categories                                                                 | Euthyroid       |          | 94.5 (22,174) |  |
|                                                                            | Hypothyroidism  |          | 5.0 (1,179)   |  |
|                                                                            | Hyperthyroidism |          | 0.4 (97)      |  |

319

## 320 **DISCUSSION**

321 The ICMR-SPIC dataset represents a landmark collaborative initiative consolidating data  
322 from 10 well-characterized pregnancy cohorts spanning diverse regions of India. This  
323 harmonized dataset, encompassing 229,695 participants from both urban and rural settings, is  
324 the largest of its kind in the country, which will facilitate robust analyses of stillbirth  
325 prevalence, associated risk factors, and predictive models for high-risk pregnancies. Using  
326 standardized methodologies and harmonized definitions enhances the dataset's reliability,  
327 allowing national and regional estimates to support evidence-based policy formulation and  
328 targeted intervention design. The findings will underscore critical maternal health challenges  
329 leading to a high burden of stillbirth in the country, including a high prevalence of  
330 malnutrition, anemia, pregnancy complications such as gestational diabetes and preeclampsia,  
331 and significant exposure to passive smoking and biomass fuels. However, the dataset  
332 highlights notable gaps in representation, mainly from eastern India and tribal populations,  
333 and inconsistencies in data collection methods across cohorts. These factors necessitate  
334 careful consideration during data analysis and interpretation to ensure accurate and  
335 meaningful insights. Despite limitations, including incomplete data on pre-conception factors,  
336 intrapartum care, and variability in measurement methods, the scale and scope of the ICMR-  
337 SPIC dataset offer an unprecedented opportunity to develop predictive models and design  
338 context-specific interventions and is a major step forward in collaborative research within  
339 India.

## 340 **CONCLUSION**

341 The ICMR-SPIC demonstrates the value of large-scale collaborative data harmonization  
342 approaches to address critical public health challenges like stillbirth in India. By pooling data  
343 from diverse pregnancy cohorts, this unique effort enables robust, generalizable insights into  
344 the prevalence and region-specific risk factors for stillbirths, and facilitates the development  
345 of a prediction model to identify pregnancies at high risk of stillbirths. These efforts will  
346 inform evidence-based clinical guidelines, interventions, and policymaking, thereby  
347 addressing the goal of reducing rates of preventable stillbirths in India, and achieving the  
348 national and global targets.

349

350

351 **FURTHER DETAILS**

352 **Data availability statement**

353 All contributing research teams have acknowledged that the pooled data can only be used for  
354 collaborative activities within the ICMR-SPIC consortium, with no transfer of ownership.

355

356 **Funding**

357 This study was funded by the Indian Council of Medical Research to create a harmonised  
358 pooled dataset across ten pregnancy cohorts in India and to conduct secondary analysis using  
359 this dataset.

360

361 **Contributors**

362 ICMR conceptualized the study. RC, RT, and RM designed the study with input from all  
363 members of the ICMR-SPIC consortium and the Technical Advisory Group (TAG). RM, AY,  
364 and JM were responsible for data cleaning, data preparation, and statistical analyses,  
365 supervised by RC, RT and TAG. All authors contributed to data acquisition and interpretation  
366 of results. DM and RC drafted, and MN edited the manuscript; all authors reviewed it and  
367 provided consent for publication of the final version.

368 **ICMR-SPIC Consortium**

369

| Cohort                                                                                            | Consortium member(s)          | Affiliation(s)                                                                                                                  |
|---------------------------------------------------------------------------------------------------|-------------------------------|---------------------------------------------------------------------------------------------------------------------------------|
| Calcium in Pregnancy (CalPreg)                                                                    | Dr Pratibha Dwarkanath        | Associate Professor, Division of Nutrition, St. John's Research Institute, Bangalore                                            |
|                                                                                                   | Mr John Michael Raj           | Lecturer, Department of Biostatistics, St. John's Medical College, Bangalore                                                    |
|                                                                                                   | Dr Anura V Kurpad             | Professor, Department of Physiology, St. John's Medical College, Bangalore                                                      |
|                                                                                                   | Dr. Tinku Thomas              | Prof and Head, Department of Biostatistics, St. John's Medical College, Bangalore                                               |
| Interdisciplinary Group for Advanced Research on Birth Outcomes - DBT India Initiative (GARBHINI) | Dr Ramachandran Thiruvengadam | Assistant Professor, Department of Biochemistry, Pondicherry Institute of Medical Sciences, Puducherry, India                   |
|                                                                                                   | Ms Ayushi                     | Biostatistician, Clinical Development Services Agency, Translational Health Science and Technology Institute, Faridabad, India. |
|                                                                                                   | Dr Rahul Jain                 | Project Research Scientist-I, Translational Health Science and Technology Institute, Faridabad, India                           |
|                                                                                                   | Dr Nitya Wadhwa               | Senior Professor, Translational Health Science and Technology Institute, Faridabad, India                                       |
|                                                                                                   | Dr Shinjini Bhatnagar         | Distinguished Professor, Translational Health Science and Technology Institute, Faridabad, India                                |
| Longitudinal Indian Family                                                                        | Dr Kalpana Basany             | Professor and Head, Department of Obstetrics and Gynaecology, MediCiti Institute of Medical Sciences, Hyderabad                 |



|                                                                            |                             |                                                                                                                                                                                                                                                                                                                       |
|----------------------------------------------------------------------------|-----------------------------|-----------------------------------------------------------------------------------------------------------------------------------------------------------------------------------------------------------------------------------------------------------------------------------------------------------------------|
| hHealth Pilot Study (LiFE)                                                 | Dr Shailendra Dandge        | Professor and Head, Department of Pharmacology, MedCiti Institute of Medical Sciences, SHARE INDIA, Hyderabad, India                                                                                                                                                                                                  |
|                                                                            | Dr Catherine L Haggerty     | Professor, Department of Epidemiology, University of Pittsburgh School of Public Health, USA                                                                                                                                                                                                                          |
|                                                                            | Late Dr Cleareann H Bunker  | Associate Professor Emerita, Department of Epidemiology, School of Public Health, University of Pittsburgh, USA                                                                                                                                                                                                       |
|                                                                            | Dr PS Reddy                 | Professor of Medicine, University of Pittsburgh, USA                                                                                                                                                                                                                                                                  |
| Maternal Antecedents of Adiposity and Studying Hyperglycemia (MAASTHI)     | Dr Giridhara R Babu         | Professor, Department of Population Medicine, College of Medicine, Qatar University, Doha, Qatar.                                                                                                                                                                                                                     |
|                                                                            | Dr Debarati Mukherjee       | Professor, Centre for Developmental and Lifecourse Research, Indian Institute of Public Health-Bengaluru, Public Health Foundation of India, Bengaluru                                                                                                                                                                |
|                                                                            | Dr Deepa R                  | Senior Research Associate, Centre for Developmental and Lifecourse Research, Indian Institute of Public Health-Bengaluru, Public Health Foundation of India, Bengaluru                                                                                                                                                |
|                                                                            | Yamuna Ana                  | Research Associate, Indian Institute of Public Health-Bengaluru, Public Health Foundation of India, Bengaluru                                                                                                                                                                                                         |
| Maternal and Child Health Translational Research Initiative (MaatHRI)      | Dr Manisha Nair             | Chief Investigator, MaatHRI; Professor of Epidemiology and Population Health Research (Hon), Srimanta Sankaradeva University of Health Sciences, Government of Assam, Guwahati, India; and Senior Research Fellow and Associate Professor, Nuffield Department of Population Health, University of Oxford, Oxford, UK |
|                                                                            | Dr Saswati Sanyal Choudhury | Professor of Obstetrics and Gynaecology, Guwahati Medical College, Guwahati, Assam                                                                                                                                                                                                                                    |
| Maternal Newborn Health Registry (MNHR)-Belagavi                           | Dr Shivaprasad S Goudar     | Professor of Physiology, J N Medical College, and Director-Research, KLE Academy of Higher Education and Research, Belagavi, India                                                                                                                                                                                    |
|                                                                            | Dr Manjunath S Somannavar   | Professor of Biochemistry, J N Medical College, KLE Academy of Higher Education and Research, Belagavi, India                                                                                                                                                                                                         |
|                                                                            | Dr Sangappa M Dhaded        | Professor and Head, Department of Neonatology, J N Medical College, KLE Academy of Higher Education and Research, Belagavi, India                                                                                                                                                                                     |
|                                                                            | Dr Avinash Kavi             | Associate Professor of Community Medicine, J N Medical College, KLE Academy of Higher Education and Research, Belagavi, India                                                                                                                                                                                         |
|                                                                            | Dr Deepthy M Sadanandan     | Research Scientist and Biostatistician, JNMC Women's and Children's Health Research Unit, J N Medical College, KLE Academy of Higher Education and Research, Belagavi, India                                                                                                                                          |
| Maternal Newborn Health Registry (MNHR)Nagpur                              | Dr Archana Patel            | Program Director, Lata Medical Research Foundation, Nagpur, India<br>Adjunct Faculty-Medical Research, Datta Meghe Institute of Higher Education and Research, Sawangi, India                                                                                                                                         |
|                                                                            | Dr Kunal Kurhe              | Coordinator, Lata Medical Research Foundation, Nagpur, India                                                                                                                                                                                                                                                          |
|                                                                            | Dr Prabir Kumar Das         | Country Coordinator, Lata Medical Research Foundation, Nagpur, India                                                                                                                                                                                                                                                  |
|                                                                            | Dr Vaishali Khedikar        | Country Coordinator, Lata Medical Research Foundation, Nagpur, India                                                                                                                                                                                                                                                  |
|                                                                            | Alka Dafare                 | Statistician, Lata Medical Research Foundation, Nagpur, India                                                                                                                                                                                                                                                         |
| Pune Maternal Nutrition Study (PMNS)                                       | Dr Chittaranjan S Yajnik    | Director, Diabetes Unit, KEM Hospital and Research Centre, Pune, India                                                                                                                                                                                                                                                |
|                                                                            | Dr Urmila Deshmukh          | Consultant Pediatrician and Neonatologist, KEM Hospital and Research Centre, Pune, India                                                                                                                                                                                                                              |
| Research Exploring Various Aspects and Mechanisms in Preeclampsia (REVAMP) | Dr Sadhana Joshi            | Professor and Head, Mother and Child Health, ICMR Collaborating Centre of Excellence, Interactive Research School for Health Affairs, Bharati Vidyapeeth University, Pune, India                                                                                                                                      |
|                                                                            | Dr Girija Wagh              | Professor and Head, Department of Obstetrics and Gynaecology, Bharati Hospital and Research Centre, Pune, India                                                                                                                                                                                                       |
|                                                                            | Dr Sanjay Lalwani           | Medical Director, Professor and Head, Dept of Paediatrics, Bharati Hospital and Research Centre, Pune, India                                                                                                                                                                                                          |
|                                                                            | Dr Sanjay Gupte             | Director, Gupte Hospital and Research Centre, Pune, India                                                                                                                                                                                                                                                             |
|                                                                            | Dr Juhi Nema                | Assistant Professor, Mother and Child Health, ICMR Collaborating                                                                                                                                                                                                                                                      |

|                                                                     |                      |                                                                                                                             |
|---------------------------------------------------------------------|----------------------|-----------------------------------------------------------------------------------------------------------------------------|
|                                                                     |                      | Centre of Excellence, Interactive Research School for Health Affairs, Bharati Vidyapeeth University, Pune, India            |
| Women and Infants Integrated Interventions for Growth Study (WINGS) | Dr Ranadip Chowdhury | Scientist and Assistant Director, Centre for Health Research and Development, Society for Applied Studies, New Delhi, India |
|                                                                     | Dr Rukman Manapurath | Scientist, Centre for Health Research and Development, Society for Applied Studies, New Delhi, India                        |
|                                                                     | Dr Sunita Taneja     | Senior Scientist, Society for Applied Studies, New Delhi, India                                                             |
|                                                                     | Dr Neeta Dhabhai     | Senior Clinical Researcher, Society for Applied Studies, New Delhi, India                                                   |
|                                                                     | Dr Nita Bhandari     | Senior Scientist and Director, Society for Applied Studies, New Delhi, India                                                |
| ICMR, New Delhi                                                     | Dr RM Pandey         | Dr A.S. Paintal Distinguished Scientist Chair, ICMR New Delhi                                                               |
|                                                                     | Dr Bharati Kulkarni  | Scientist G, Head, Division of Reproductive, Child Health and Nutrition, ICMR New Delhi                                     |
|                                                                     | Dr Reema Mukherjee   | Scientist E, Division of Reproductive, Child Health and Nutrition, ICMR New Delhi                                           |

370

### 371 Acknowledgement

372 We sincerely thank the study participants for sharing valuable information and biological  
 373 samples for the conduct of this study. Additionally, each cohort team thanks the following  
 374 research staff for supporting the preparation of the harmonized dataset. We are thankful to the  
 375 primary funding agencies of the cohorts for granting permission to share the data for this  
 376 exercise.

| Cohort(in alphabetical order) | Acknowledgement                                                                                                                                                                                                                                                                                                                                                                                                                                                                                                                                                                                                                                                                                                                                                                                                                                                                                                                                                                                                                                                                                                                                                                                                                                                                                                                                                                                                                                                                                                                                                                                                                                                                                                                                                                                                                                                                                                                                                                                                                                                                                                                                                           |
|-------------------------------|---------------------------------------------------------------------------------------------------------------------------------------------------------------------------------------------------------------------------------------------------------------------------------------------------------------------------------------------------------------------------------------------------------------------------------------------------------------------------------------------------------------------------------------------------------------------------------------------------------------------------------------------------------------------------------------------------------------------------------------------------------------------------------------------------------------------------------------------------------------------------------------------------------------------------------------------------------------------------------------------------------------------------------------------------------------------------------------------------------------------------------------------------------------------------------------------------------------------------------------------------------------------------------------------------------------------------------------------------------------------------------------------------------------------------------------------------------------------------------------------------------------------------------------------------------------------------------------------------------------------------------------------------------------------------------------------------------------------------------------------------------------------------------------------------------------------------------------------------------------------------------------------------------------------------------------------------------------------------------------------------------------------------------------------------------------------------------------------------------------------------------------------------------------------------|
| CalPreg                       | Dr. Wafaie W. Fawzi, Department of Global Health and Population, Harvard T.H. Chan School of Public Health, Boston, Massachusetts, USA (the primary recipient of the multicentric grant), for allowing the use of the India trial data for this analysis.                                                                                                                                                                                                                                                                                                                                                                                                                                                                                                                                                                                                                                                                                                                                                                                                                                                                                                                                                                                                                                                                                                                                                                                                                                                                                                                                                                                                                                                                                                                                                                                                                                                                                                                                                                                                                                                                                                                 |
| GARBHINI                      | Department of Biotechnology, Government of India for permitting to participate in the consortium GARBH-Ini study team (Shinjini Bhatnagar, Nitya Wadhwa, Uma Chandra MouliNatchu, Bhabatosh Das, Pallavi S Kshetrapal, Shailaja Sopory, Ramachandran Thiruvengadam, Sumit Misra, Dharmendra Sharma, Kanika Sachdeva, Amanpreet Singh, Balakrish G Nair, Satyajit Rath, and Vineeta Bal (Translational Health Science and Technology Institute, Faridabad, Haryana, India); Alka Sharma, Sunita Sharma, Umesh Mehta, and Brahmdeep Sindhu (Gurugram Civil Hospital, Gurugram, India); Pratima Mittal, Rekha Bharti, Harish Chellani, Rani Gera, Jyotsna Suri, Pradeep Debata, and Sugandha Arya (Vardhman Mahavir Medical College & Safdarjung Hospital, New Delhi, India); Arindam Maitra (National Institute of Biomedical Genomics, Kalyani, India); Tushar K Maiti (Regional Centre for Biotechnology, Faridabad, India); Dinakar M Salunke (International Centre for Genetic Engineering and Biotechnology, New Delhi, India); Nikhil Tandon, Yashdeep Gupta, Alpesh Goyal, Smriti Hari, Aparna Sharma K, and Anubhuti Rana (All India Institute of Medical Sciences, New Delhi, India); SiddarthRamji and Anju Garg (Maulana Azad Medical College, New Delhi, India); Ashok Khurana (The Ultrasound Lab, Defence Colony, New Delhi, India); Reva Tripathi (Sitaram Bhartia Institute of Science and Research, New Delhi, India); Rakesh Gupta and Partha P Majumder (Government of India); Himanshu Sinha and Raghunathan Rengasamy (Indian Institute of Technology Madras, Chennai, India); Vineeta Bal (Indian Institute of Science Education and Research, Pune, India); Pratima Mittal (Amrita Institute of Medical Sciences & Research Centre, Faridabad, India); Uma Chandra MouliNatchu and Harish Chellani (Center for Health Research and Development, Society for Applied Studies, New Delhi, India); and Ramachandran Thiruvengadam (Pondicherry Institute of Medical Sciences, Puducherry, India).Members listed in the supplementary)<br>Mr Ashu Sharma, Technical officer-II, Translational Health Science and Technology Institute, Faridabad, India. |
| LiFE                          | Mr Purushotham Reddy R, Head, Information Technology, Mr Narender Konga, Data Assistant, and Mrs Deepa V Project Manager, MediCiti Institute of Medical Sciences, SHARE INDIA, Hyderabad, India                                                                                                                                                                                                                                                                                                                                                                                                                                                                                                                                                                                                                                                                                                                                                                                                                                                                                                                                                                                                                                                                                                                                                                                                                                                                                                                                                                                                                                                                                                                                                                                                                                                                                                                                                                                                                                                                                                                                                                           |
| MAASTHI                       | Ms Suganya S, Indian Institute of Public Health-Bengaluru, PHFI                                                                                                                                                                                                                                                                                                                                                                                                                                                                                                                                                                                                                                                                                                                                                                                                                                                                                                                                                                                                                                                                                                                                                                                                                                                                                                                                                                                                                                                                                                                                                                                                                                                                                                                                                                                                                                                                                                                                                                                                                                                                                                           |
| MaatHRI                       | Dr Tuck Seng Cheng, University of Oxford; Ms RupanjaliDeka, Srimanta Sankaradeva University of Health Sciences, Guwahati, and all MaatHRI site collaborators, namely;Farzana Zahir, Carolin                                                                                                                                                                                                                                                                                                                                                                                                                                                                                                                                                                                                                                                                                                                                                                                                                                                                                                                                                                                                                                                                                                                                                                                                                                                                                                                                                                                                                                                                                                                                                                                                                                                                                                                                                                                                                                                                                                                                                                               |

|               |                                                                                                                                                                                                                                                                                                                                                                                                                                                                                                                                                                                                                                                                                                                                                                                                                                                                                                                                                                                                                                                                                                                                                                                                                                                                                                                                                                                                                                                      |
|---------------|------------------------------------------------------------------------------------------------------------------------------------------------------------------------------------------------------------------------------------------------------------------------------------------------------------------------------------------------------------------------------------------------------------------------------------------------------------------------------------------------------------------------------------------------------------------------------------------------------------------------------------------------------------------------------------------------------------------------------------------------------------------------------------------------------------------------------------------------------------------------------------------------------------------------------------------------------------------------------------------------------------------------------------------------------------------------------------------------------------------------------------------------------------------------------------------------------------------------------------------------------------------------------------------------------------------------------------------------------------------------------------------------------------------------------------------------------|
|               | Solomi V, Ashok Verma, Sereesha Rao, SaswatiSanyal Choudhury, GitanjaliDeka, Pranabika Mahanta, Swapna Kakoty, Robin Medhi, Shakuntala Chhabra, Anjali Rani, Amrit Bora, Indrani Roy, Bina Minzand, Omesh Kumar Bharti. Members of MaatHRI study team:<br>Manisha Nair, Farzana Zahir, Carolin Solomi V, Ashok Verma, Sereesha Rao, SaswatiSanyal Choudhury, Gitanjali Deka, Pranabika Mahanta, Swapna Kakoty, Robin Medhi, Shakuntala Chhabra, Anjali Rani, Amrit Bora, Indrani Roy, Bina Minz, Omesh Kumar Bharti, Rupanjali Deka, Tuck Seng Cheng.                                                                                                                                                                                                                                                                                                                                                                                                                                                                                                                                                                                                                                                                                                                                                                                                                                                                                                |
| MNHR-Belagavi | Dr N V Honnungar, Field Research Officer, JNMC Women’s and Children’s Health Research Unit; Dr Richard J Derman, Associate Provost Global Affairs, Director Global Health Research, Professor OBGYN, Thomas Jefferson University, PA USA; Dr. Elizabeth M McClure and Ms. Janet Moore, RTI International, Durham, NC, USA ;Dr. Marion Koso-Thomas, <i>Eunice Kennedy Shriver</i> National Institute of Child Health and Human Development, Bethesda, MD, USA; Dr Ashalata Mallapur and Dr Umesh Ramadurg, S N Medical College, Bagalkot; Medical Officers of Department of Health and Family Welfare, Government of Karnataka: Dr B D Yalgudri, Dr S M Vijapur, Dr Shivanand S Mulakuri, Dr Vrushbendra D Hiremath, Dr Ramkrishna Yadgude, Dr M J Kumbhar, Dr B N Kirankumar, Dr Salim Mujawar, Dr S G Shetter, Dr S C Mastiholi, Dr Udaya Kudachi, Dr Shaheed S Gadekai, Dr S M Chavadappanavar, Dr R G Patil, Dr Harsha Patil, Dr S G Kamble, Dr Prashant Gaikwad, Dr R A Makhandar, Dr S S Doddmani, Dr BapusahebPatil, Dr C S Patil, Dr Sukanya Handage, Dr R S Balikai, Dr Rajashekar Mudhkamath, Dr S SSiddannavar, Dr Anil S Salagure, Dr Rajendra K Kilabanur, Dr Arun V Halagatti, Dr Poornima Tallur, Dr Shridhar Pattar, Dr (Mrs) Kusuma Magi, Dr Vishwanath M Pattar, Dr Vikas B Parvaikar, Dr Bhagya Kshatri, Dr Ashok Kuntoji; Mr. Nagaraj Khade, Mr. Sachin Mastiholi, Mr. Vinayak Mhetri, Mr. Dayanand Shiroor, Mr. Kadappa Beniwadi |
| MNHR Nagpur   | Dr. Patricia Hibberd, Department of Global Health, Boston University School of Public Health, Boston, MA, USA; Dr. Elizabeth M McClure and Ms. Janet Moore, RTI International, Durham, NC, USA; Dr. Marion Koso-Thomas, <i>Eunice Kennedy Shriver</i> National Institute of Child Health and Human Development, Bethesda, MD, USA; Officials, Department of Health and Family Welfare, Government of Maharashtra, India; Ms. Smita Puppalwar, Dr. Rakesh Kukde, Dr. Damodar Saliwkar, Dr. Shashank Parankar, Mr. Nitesh Meshram, Lata Medical Research Foundation, Nagpur, India.                                                                                                                                                                                                                                                                                                                                                                                                                                                                                                                                                                                                                                                                                                                                                                                                                                                                    |
| PMNS          | Dr Prachi Phadke and Onkar Deshmukh, KEM Hospital and Research Centre, Pune, India                                                                                                                                                                                                                                                                                                                                                                                                                                                                                                                                                                                                                                                                                                                                                                                                                                                                                                                                                                                                                                                                                                                                                                                                                                                                                                                                                                   |
| REVAMP        | Karuna Randhir, Interactive Research School for Health Affairs, Bharat Vidyapeeth University                                                                                                                                                                                                                                                                                                                                                                                                                                                                                                                                                                                                                                                                                                                                                                                                                                                                                                                                                                                                                                                                                                                                                                                                                                                                                                                                                         |
| WINGS         | Kiran Bhatia, Society for Applied Studies, New Delhi, India                                                                                                                                                                                                                                                                                                                                                                                                                                                                                                                                                                                                                                                                                                                                                                                                                                                                                                                                                                                                                                                                                                                                                                                                                                                                                                                                                                                          |

377

378 The ICMR-SPIC consortium would also like to thank the technical advisory group members  
379 for their support in conceptualizing the specific objectives and statistical analysis plan for this  
380 study.

381

### 382 **Technical Advisory Group of the ICMR-SPIC consortium**

| Sr. No | Member name                | Institution                                                          |
|--------|----------------------------|----------------------------------------------------------------------|
| 1      | Dr RM Pandey (Chairperson) | Dr A.S. Paintal Distinguished Scientist Chair, ICMR New Delhi        |
| 2      | Dr Anamika Gambhir         | Department of Biotechnology, Govt. of India                          |
| 3      | Dr Shobhna Das             | Ministry of Health and Family Welfare, Govt. of India                |
| 4      | Dr Rakhi Dandona           | Public Health Foundation of India, New Delhi, India                  |
| 5      | Dr Pranay Goel             | Indian Institute of Science Education and Research, Pune, India      |
| 6      | Dr Rajiv Sarkar            | Indian Institute of Public Health, Shillong, India                   |
| 7      | Col (Dr) Arun Kumar Yadav  | Office of Director General of Armed Forces Medical Services in India |
| 8      | Dr K Aparna Sharma         | All India Institute of Medical Sciences, New Delhi, India            |

383

### 384 **Competing interests**

385 All authors declare no conflicts of interest for this study.

386

### 387 **Disclaimer**

388 The authors alone are responsible for the views expressed in this paper, and they do not  
389 necessarily represent the views, decisions, or policies of the institutions with which they are  
390 affiliated.

391

## 392 **References:**

- 393 1 Stillbirth. <https://www.who.int/health-topics/stillbirth> (accessed 25 October 2024)
- 394 2 Datta V, Ghosh S, Aquino LD. Progressing towards SDG 2030 goals with system changes: the India  
395 Newborn Action Plan. *BMJ Open Quality*. 2022;11:e001971. doi: 10.1136/bmjopen-2022-001971
- 396 3 Comfort H, McHugh TA, Schumacher AE, et al. Global, regional, and national stillbirths at 20 weeks'  
397 gestation or longer in 204 countries and territories, 1990–2021: findings from the Global Burden of Disease  
398 Study 2021. *The Lancet*. 2024;404:1955–88. doi: 10.1016/S0140-6736(24)01925-1
- 399 4 Dandona R, Kumar GA, Mahapatra T. Turning the tide with better data to address stillbirths in India. *The  
400 Lancet Regional Health - Southeast Asia*. 2024;0. doi: 10.1016/j.lansea.2024.100509
- 401 5 Dandona R, Kumar GA, Akbar Md, et al. Deferred and referred deliveries contribute to stillbirths in the  
402 Indian state of Bihar: results from a population-based survey of all births. *BMC Medicine*. 2019;17:28. doi:  
403 10.1186/s12916-019-1265-1
- 404 6 McClure EM, Saleem S, Goudar SS, et al. Stillbirth 2010–2018: a prospective, population-based, multi-  
405 country study from the Global Network. *Reproductive Health*. 2020;17:146. doi: 10.1186/s12978-020-  
406 00991-y
- 407 7 Dandona R, George S, Majumder M, et al. Stillbirth undercount in the sample registration system and  
408 national family health survey, India. *Bulletin of the World Health Organization*. 2023;101:191. doi:  
409 10.2471/BLT.22.288906
- 410 8 Purbey A, Nambiar A, Choudhury DR, et al. Stillbirth rates and its spatial patterns in India: an exploration  
411 of HMIS data. *The Lancet Regional Health - Southeast Asia*. 2023;9. doi: 10.1016/j.lansea.2022.100116
- 412 9 Dandona R, Kumar GA, Kumar A, et al. Identification of factors associated with stillbirth in the Indian state  
413 of Bihar using verbal autopsy: A population-based study. *PLOS Medicine*. 2017;14:e1002363. doi:  
414 10.1371/journal.pmed.1002363
- 415 10 Lawn JE, Blencowe H, Pattinson R, et al. Stillbirths: Where? When? Why? How to make the data count?  
416 *The Lancet*. 2011;377:1448–63. doi: 10.1016/S0140-6736(10)62187-3
- 417 11 Khosravi A, Mansournia MA. Recommendation on unbiased estimation of population attributable fraction  
418 calculated in "prevalence and risk factors of active pulmonary tuberculosis among elderly people in China: a  
419 population based cross-sectional study." *Infectious Diseases of Poverty*. 2019;8:75. doi: 10.1186/s40249-  
420 019-0587-8
- 421 12 Dandis R, Teerenstra S, Massuger L, et al. A tutorial on dynamic risk prediction of a binary outcome based  
422 on a longitudinal biomarker. *Biometrical Journal*. 2020;62:398–413. doi: 10.1002/bimj.201900044
- 423 13 Li Z, Kong Y, Chen S, et al. Independent and cumulative effects of risk factors associated with stillbirths in  
424 50 low- and middle-income countries: A multi-country cross-sectional study. *eClinicalMedicine*. 2022;54.  
425 doi: 10.1016/j.eclinm.2022.101706
- 426 14 Saleem S, Tikmani SS, McClure EM, et al. Trends and determinants of stillbirth in developing countries:  
427 results from the Global Network's Population-Based Birth Registry. *Reproductive Health*. 2018;15:100. doi:  
428 10.1186/s12978-018-0526-3
- 429
